# Supplementary material
Source: publisher figshare collection journal article supplement (https://acs.figshare.com/ndownloader/files/3846145)

## Supporting Information

**Table S1**

Quality control results and certified values of the NIST1567 wheat flour (mg/kg dry matter) and the limit of quantification (LOQ) of the procedure (mg/kg). Means and standard deviations (in brackets) of 3 analytical replicates

|    | Analytical results | Certified values | LOQ   |
|----|--------------------|------------------|-------|
| K  | 1311 (32)          | 1330 (3)         | 14    |
| P  | 1321 (20)          | 1340 (6)         | 1     |
| Mg | 380 (7)            | 400 (2)          | 11    |
| Ca | 199 (8)            | 191 (4)          | 26    |
| Si | 7.5 (0.7)          | -                | 2     |
| Fe | 13.2 (0.1)         | 14.1 (0.5)       | 1.0   |
| Zn | 11.5 (0.3)         | 11.6 (0.4)       | 0.3   |
| Mn | 9.4 (0.4)          | 9.4 (0.9)        | 0.1   |
| Cu | 2.1 (0.1)          | 2.1 (0.2)        | 0.1   |
| Sr | 0.93 (0.05)        | -                | 0.06  |
| Mo | 0.45 (0.2)         | 0.48 (0.03)      | 0.01  |
| Se | 1.3 (0.1)          | 1.1 (0.2)        | 0.001 |
| Cd | 0.024 (0.001)      | 0.026 (0.002)    | 0.001 |

**Figure S1**

Correlations among different elements present in wheat grains (■) and its milling [flour (■), shorts (▲), bran (●)] and pearling (▲) fractions.

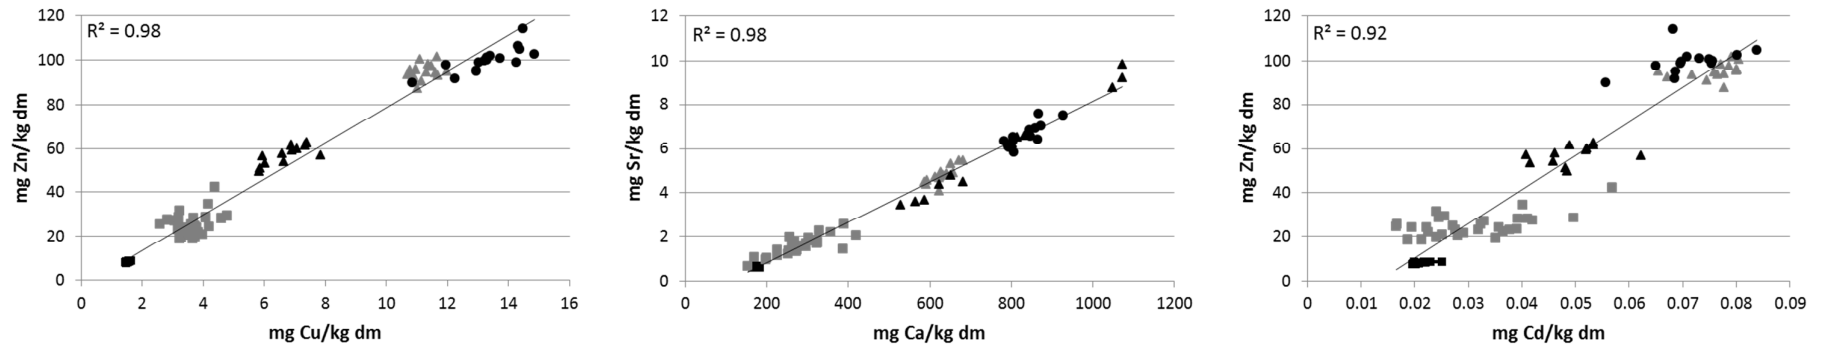

Supplement: Supplementary file 1 [file 3846145]
